RESEARCH ARTICLE

# Expression and contribution to virulence of each polysaccharide capsule of *Bacillus cereus* strain G9241

Jennifer M. Scarff, Yuliya I. Seldina, James M. Vergis, Christy L. Ventura, Alison D. O'Brien\*

Department of Microbiology and Immunology, Uniformed Services University of the Health Sciences, Bethesda, MD, United States of America

\* [alison.obrien@usuhs.edu](mailto:alison.obrien@usuhs.edu)

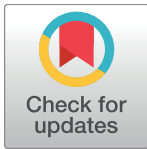

**OPEN ACCESS**

**Citation:** Scarff JM, Seldina YI, Vergis JM, Ventura CL, O'Brien AD (2018) Expression and contribution to virulence of each polysaccharide capsule of *Bacillus cereus* strain G9241. PLoS ONE 13(8): e0202701. <https://doi.org/10.1371/journal.pone.0202701>

**Editor:** Theresa M. Koehler, University of Texas Medical School at Houston, UNITED STATES

**Received:** April 13, 2018

**Accepted:** August 6, 2018

**Published:** August 22, 2018

**Copyright:** This is an open access article, free of all copyright, and may be freely reproduced, distributed, transmitted, modified, built upon, or otherwise used by anyone for any lawful purpose. The work is made available under the [Creative Commons CC0](https://creativecommons.org/licenses/by/4.0/) public domain dedication.

**Data Availability Statement:** All relevant data are within the paper and its Supporting Information files.

**Funding:** This study was supported by awards HU0001-15-2-0030 and HU0001-16-2-0066 (ADO) from the Biological Defense Research Directorate of the Naval Medical Research Center and R21 AI111101 (ADO) from the National Institute of Allergy and Infectious Diseases. The opinions and assertions contained herein are the private ones of the authors and are not to be construed as official

## Abstract

*Bacillus cereus* strain G9241 was isolated from a patient with pneumonia who had an anthrax-like illness. Like *Bacillus anthracis*, the virulence of G9241 is dependent on two large plasmids. In G9241 those plasmids are pBCXO1 and pBC210. There is a multi-gene capsule locus on each of these virulence plasmids, and both capsules are produced by G9241 *in vitro* and in mice. The *hasACB* operon on pBCXO1 is responsible for production of a hyaluronic acid (HA) capsule. The locus on pBC210 encodes a putative tetrasaccharide (TS) capsule that assembles in a Wzy-dependent manner. We found that the pBC210 capsule locus is transcribed as two operons and identified the promoter regions responsible for transcription. We constructed isogenic mutants to assess the role of genes in the two TS capsule operons in production of the capsule. Spores of strains deficient in production of either the HA or TS capsule were inoculated subcutaneously or intranasally into A/J and C57BL/6 mice to determine the lethal dose 50% of each bacterial mutant by each route of infection. The loss of the HA capsule attenuated G9241 more than the loss of the TS capsule for both infection routes in both mouse strains. Overall, our data further characterize the unique TS capsule on pBC210 and demonstrate that the two capsules do not have the same impact on virulence of G9241.

## Introduction

The *Bacillus cereus sensu lato* group consists of both *B. cereus* and *Bacillus anthracis*. *B. cereus* is typically associated with food poisoning or infections in immunocompromised patients while *B. anthracis* is the etiologic agent of anthrax [1]. There are two virulence plasmids in *B. anthracis* which are critical to disease progression, pXO1 and pXO2. The toxigenic plasmid, pXO1, encodes protective antigen (PA), lethal factor (LF), edema factor (EF), and virulence regulator AtxA [2–5]. The operon required for production of the poly- $\gamma$ -D-glutamic acid (PDGA) capsule is encoded on pXO2 [6].

*B. cereus* strain G9241 was isolated from a patient who suffered from an anthrax-like respiratory infection. G9241 contains two virulence plasmids. One of these, pBCXO1, is highly

or reflecting the views of the Department of Defense, the Department of the Navy, the Uniformed Services University of the Health Sciences, or the National Institutes of Health.

**Competing interests:** The authors have declared that no competing interests exist.

similar to pXO1 and also encodes PA, LF, EF, and AtxA1 while the other plasmid, pBC210 (formerly pBC218), is unique compared to pXO2 [7]. In fact, pBC210 encodes a PA homolog (PA2), a novel ADP-ribosylating toxin, certhrax, and an AtxA homolog, AtxA2 [7–10]. Each virulence plasmid also contains genetic loci that encode the proteins to construct a polysaccharide capsule. Plasmid pBCXO1 carries the *hasACB* operon that is responsible for production of a hyaluronic acid (HA) capsule, while pBC210 contains a capsule locus that is required for elaboration of a putative tetrasaccharide (TS) capsule [7].

The two capsules in G9241 are both produced *in vivo* [11, 12]. The HA capsule is regulated by AtxA1, and the TS capsule is regulated by either AtxA1 or AtxA2 [12]. The *hasACB* operon on pBCXO1 is similar to the *hasABC* operons in *Streptococcus pyogenes* strains and is responsible for the production of an HA capsule, a disaccharide of glucuronic acid and N-acetylglucosamine. The HasA synthase assembles the high molecular weight repeating disaccharide polymers, and HasC and HasB are involved in synthesis of the nucleotide sugar precursors [13].

The capsule locus on pBC210 was initially characterized as a fifteen gene locus responsible for production of the TS capsule [7]. The final nine genes in the capsule locus were later identified as *bpsX-H* [11]. The TS capsule locus is similar in content to the Wzy-dependent polysaccharide capsules of *Streptococcus pneumoniae* [14]. The Wzy-dependent *S. pneumoniae* capsule loci encode four regulatory proteins, a glycosyltransferase for each sugar in the subunit, a flippase, a polymerase, and enzymes required to synthesize sugars that are unique to the capsule. The regulatory proteins are conserved among all serotypes, and the other proteins are serotype-specific [14, 15]. The synthesis of these types of capsules is initiated by the successive addition of each sugar subunit to a carrier molecule on the interior surface of the bacterial membrane. The Wzx flippase then “flips” the sugar moiety to the outer surface of the membrane and Wzy polymerase transfers the already formed chains on the surface to the recently “flipped” subunit.

Other *B. cereus* strains have emerged in the Southeastern United States that caused a severe anthrax-like respiratory illness in metalworkers or a cutaneous infection in a healthy adult man [16–20]. These strains are encapsulated but do not contain pXO2-like plasmids or the PDGA capsule locus [18, 21, 22]. However, the strains do contain pBCXO1-like plasmids that encode an HA capsule in addition to the PA, LF, and EF associated with *B. anthracis* [19, 21, 23]. Only about half of the isolated strains have been either PCR- or sequence-confirmed to have pBC210 or the TS capsule locus [19, 21, 22]. Although one strain, BcFL2013, isolated from the cutaneous infection, has a partial plasmid of pBC210 that does not include the TS capsule locus [23].

In addition to these emerging U.S. strains, isolates of *B. cereus* biovar *anthracis* have been found as the sources of fatal infections in great apes in Cameroon and Côte d’Ivoire and wild and domestic animals in the Central African Republic and the Democratic Republic of the Congo [24, 25]. Only the strains from the great apes in Cameroon and Côte d’Ivoire have been further genetically characterized. These strains harbor both pBCXO1 and a pXO2-like plasmid, pBCXO2. Consequently, these strains produce PA, LF, and EF as well as the HA and PDGA capsules [26, 27].

In this study, we used G9241 as a prototypical U.S. emergent strain of *B. cereus* with *B. anthracis*-associated virulence factors. We determined that the unique pBC210 TS capsule locus is comprised of two operons and identified transcriptional start sites and promoter regions for each operon. We also demonstrated that deletion of a glycosyltransferase or the polymerase from the TS capsule locus abrogated production of the capsule. Lastly, we compared the virulence of G9241 and two isogenic mutants that produced only HA or TS capsules

and determined that the HA capsule has a larger role in virulence of G9241 when compared to the TS capsule.

## Results

### Genetic characterization of pBC210 TS capsule locus

The TS capsule locus was initially identified as a fifteen gene region on pBC210 (BCE\_G9241\_pBC218\_0073 to BCE\_G9241\_pBC218\_0059) [7]. The locus contains genes associated with Wzy-dependent capsule loci that have some similarity to LPS assembly loci in Gram-negative bacteria. Consequently, we switched the original nomenclature for the genes in the TS capsule locus on pBC210 [7] to one that is universally used for proteins of similar functions between capsule and LPS loci. That nomenclature is the accepted paradigm to describe genes in the capsule loci of another Gram-positive bacterium, *S. pneumoniae* [15]. One gene in the original locus (G9241\_pBC218\_0068) encoded a short protein with no known homologs or conserved domains, so we omitted that gene from our final capsule locus genetic description. The nomenclature and predicted functions for the other fourteen genes in the TS capsule locus are presented in Fig 1. The capsule is defined as a Wzy-dependent capsule locus based on the sequence homology of genes with those that encode Wzy polymerase and Wzx flippase. In addition to these two genes, the *wzh*, *wzg*, *wzd*, and *wze* genes that are conserved among *S. pneumoniae* capsule loci are also present in the G9241 capsule locus. The pBC210 capsule locus encodes four putative glycosyltransferases. The initiating glycosyltransferase in G9241 is homologous to *wchA* in *S. pneumoniae*, a gene whose product adds a glucose to the undecaprenyl phosphate carrier molecule. The other three glycosyltransferases are predicted to add each successive sugar to the repeat unit in an undetermined order. While we do not know the structure of the TS capsule, we can deduce the likely nature of the sugar subunits based on homology to glycosyltransferases of known function. The two glycosyltransferases with homologs in *S. pneumoniae* are *WchJ*, a galactosyltransferase, and *WchO*, an N-acetylmannosaminyltransferase. The fourth transferase is homologous to *CpsK*, a sialic acid transferase from *Streptococcus agalactiae*. As *Cps* is not a specific descriptor for the protein function and with no known *S. pneumoniae* homolog, we have designated this transferase *WsiK*. The TS locus also has four genes that encode proteins predicted to synthesize sugars for the capsule. These genes are *galU* and the sialic acid synthesis genes *neuA*, *neuB*, and *neuC*.

### Transcriptional characterization of capsule locus on pBC210

Although the pBC210 capsule locus has similar genes to the capsule operons of many *S. pneumoniae* strains, the genes are not organized in a similar manner. Additionally, the *S. pneumoniae* capsule loci have small to no gaps between the genes and are transcribed as a single operon [28, 29]. Contrarily, the capsule locus in pBC210 contains three gaps between genes that are over 500 bp, and one of those gaps is over 1 kb. To determine whether this unique capsule locus is an operon, we used cDNA as a template for PCR amplification of the junctions between genes in the capsule locus (Fig 2A). The presence of a PCR result product at a gene junction indicates that the genes are transcribed together, whereas the absence of a PCR product at a gene junction implies that those two genes are not transcribed together. We were able to detect the gene junctions for the first five genes in the locus, *wchJ* to *wzh*, as well as the junctions for the last nine genes in the locus, *wzg* to *wzx* (Fig 2B). We were unable to detect the junction between *wzh* and *wzg*. These data indicated that there are two potential operons in the TS capsule locus.

To further investigate the two potential transcripts for the TS capsule locus, we used 5' RACE to map transcriptional start sites. The transcriptional start site for *wchJ* was determined

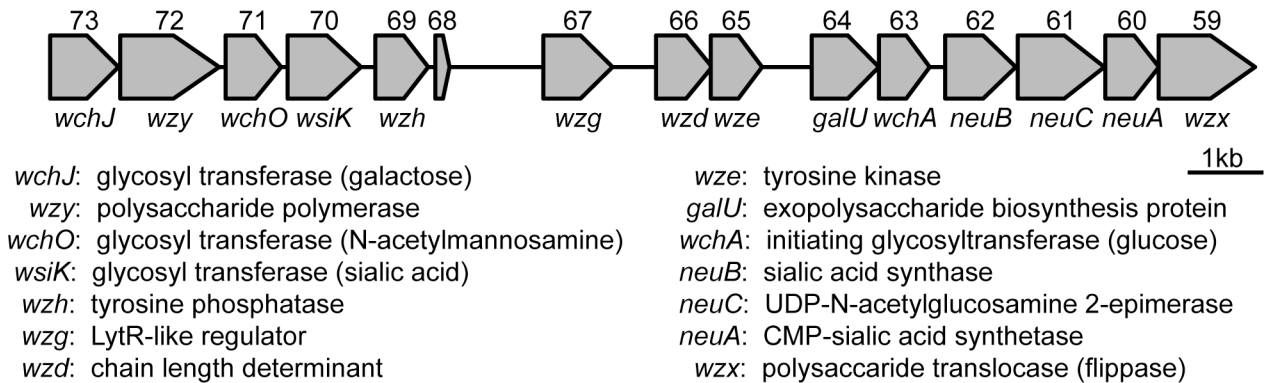

**Fig 1. A linear representation of the pBC210 capsule locus and the function of the encoded proteins.** The original locus numbers for the genes (BCE\_G9241\_pBC218\_00XX) are above the genes. The nomenclature that is consistent with Wzy-dependent capsules from *S. pneumoniae* is below each gene. The protein function for each gene product, as initially annotated or determined by homology, is listed.

<https://doi.org/10.1371/journal.pone.0202701.g001>

to be 251 bp from the start codon (Fig 3). We were unable to determine a transcriptional start site for *wzg*. Consequently, we also investigated the next gene in the second potential transcript for a transcriptional start site and determined that the *wzd* transcript started 172 bp from the start codon (Fig 3).

We used promoter fusion assays to further investigate the transcriptional start sites. We cloned fragments that were upstream of the start codon for *wchJ*, *wzd*, and *wzg* into a vector with a promoterless *lacZ* and assayed for  $\beta$ -galactosidase activity after growth in capsule-inducing conditions (Fig 4). A 160 bp fragment that was smaller than the *wchJ* 5' RACE product was unable to induce  $\beta$ -galactosidase activity in the assay. The 349 and 607 bp fragments for *wchJ* induced a significant increase of  $\beta$ -galactosidase activity compared to the empty vector control ( $P < 0.0001$ ). Similarly, a 40 bp fragment that was smaller than the 5' RACE product for *wzd* was unable to promote  $\beta$ -galactosidase activity. However, fragments of 310 and 502 bp for *wzd* induced a significant increase in  $\beta$ -galactosidase activity compared to the empty vector control ( $P < 0.0001$ ). We were unable to detect any promoter activity for even the largest fragment of *wzg*, 871 bp to translational start site. We concluded that the TS capsule has two potential operons and at least two promoter sites that facilitate gene expression.

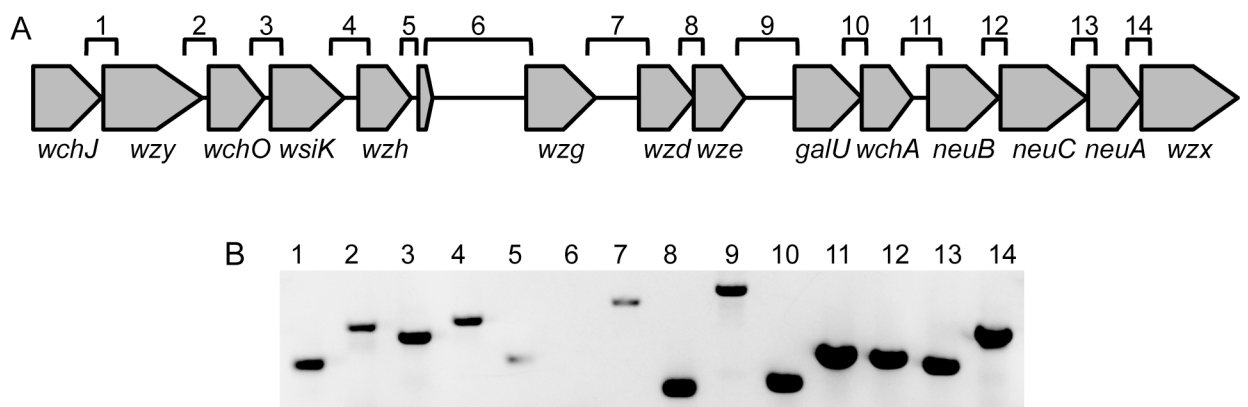

**Fig 2. TS capsule locus has two potential operons.** RNA was isolated from G9241 and used to synthesize cDNA. To determine whether transcripts included multiple genes, the cDNA was used to assay for the junctions between the genes (A) by PCR (B).

<https://doi.org/10.1371/journal.pone.0202701.g002>

5' RACE result for *wchJ*

```

1 TAAAATATCA TAGGTATATA GGTGGTACTT GGTATATTGT TATATAGCAC
51 TTCATTCAAT CTTGTAAGAT AAGTATTTTT TCCATTTTCT TTTTCTTTAC
101 TAATATGTTT ACATATACTG TATTTGTTTT GATCGCTGAT AGAGGGGAGA
151 GATGGGATGT AGCTTTTTTCT TAAAAGATAA GATAAATGGT TATATACTTT
201 CAATGTAATT CTAGCTGATA AAGATAAATA CTAGATTGTA AAAAGGTGTG
251 ATAAATAGAG AATTGCTGAA CTAAATTTAA ATTAGGAGAA ATAGATTATG
    
```

5' RACE result for *wzd*

```

1 AAAAAAAGA TACGTATCGA TTTTGTAGTA GGTATATTT TAGTTACGAT
51 ACGTGTATTA ATTTGTCATA TGGAATTAAT AACATTTTAA TAGATGAAAA
101 GGTATGTGAT GAACCTAAGT TAAAATTTAA ATATTATTAA AATATGAGGA
151 TTATCCTTAA AAGTCATGTT TATACTGTAC TTTAGAATTA AGGTGTTAGA
201 TCGATGAGGA GGAAATTATG
    
```

**Fig 3. 5' RACE results for *wchJ* and *wzd*.** The transcriptional start sites, highlighted in gray, determined by 5'RACE are 251 bp for *wchJ* (A) and 172 bp for *wzd* from the ATG start codon, in bold. Potential -10 and -35 boxes from these start sites are underlined.

<https://doi.org/10.1371/journal.pone.0202701.g003>

### Effect of capsule gene deletion on expression

We made isogenic mutants of the *hasACB* operon and *wchA*, *wzy*, *wchJ*, *wzg* in the TS capsule locus and determined the capsule phenotype for these strains. As previously reported [11, 12], G9241 produces both the HA and TS capsules. The large halo around the cells with no

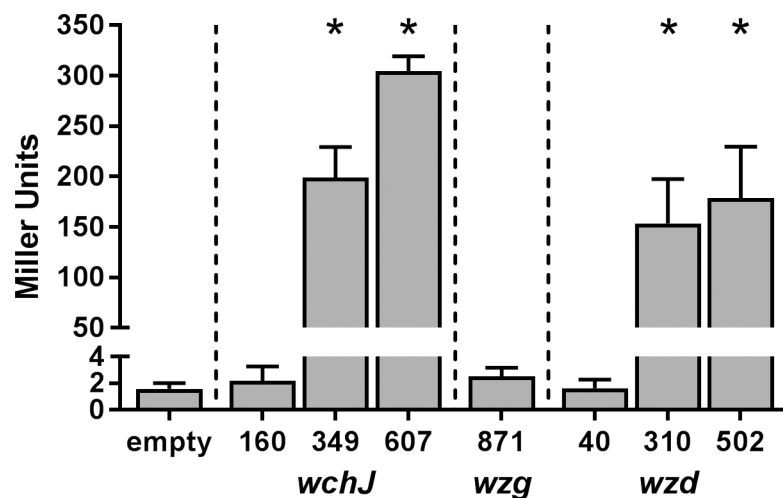

**Fig 4. Promoter activity for *wchJ*, *wzg*, and *wzd*.** Fragments proximal to the start codon for *wchJ* (160, 349, and 607 bp), *wzg* (871 bp), and *wzd* (40, 310, and 502 bp) were cloned before the promoterless *lacZ* in pHT304-18Z in strain  $\Delta wchA\Delta hasACB$ . The cells were grown under capsule-inducing conditions for 4 h, and the  $\beta$ -galactosidase activity was measured. The bars indicate the mean of four experiments and the error bars the standard deviation. \*Significantly different from empty vector control as determined by one-way ANOVA with Dunnett's multiple comparisons test ( $P < 0.0001$ ).

<https://doi.org/10.1371/journal.pone.0202701.g004>

treatment is indicative of the HA capsule (Fig 5A), and the smaller halo around the bacteria that remains after hyaluronidase treatment is the TS capsule (Fig 5B). The  $\Delta hasACB$  mutant produced only the TS capsule, as indicated by the same sized halo around cells after no treatment (Fig 5C) and with hyaluronidase treatment (Fig 5D). Deletion of the initiating glycosyltransferase of the TS capsule, *wchA*, abrogated production of the TS capsule; the  $\Delta wchA$  cells had a large halo representative of the HA capsule with no treatment (Fig 5E) and no halo remained after hyaluronidase treatment (Fig 5F). Similarly, deletion of the polymerase *wzy* (Fig 5G and 5H) or the glycosyltransferase *wchJ* (Fig 5I and 5J) also resulted in cells that produced only HA capsule, as evidenced by the loss of the halos around cells after hyaluronidase treatment. Deletion of the putative LytR-like regulator, *wzg*, had no effect on expression of either capsule; the  $\Delta wzg$  cells had the large HA halo with no treatment (Fig 5K) and the smaller

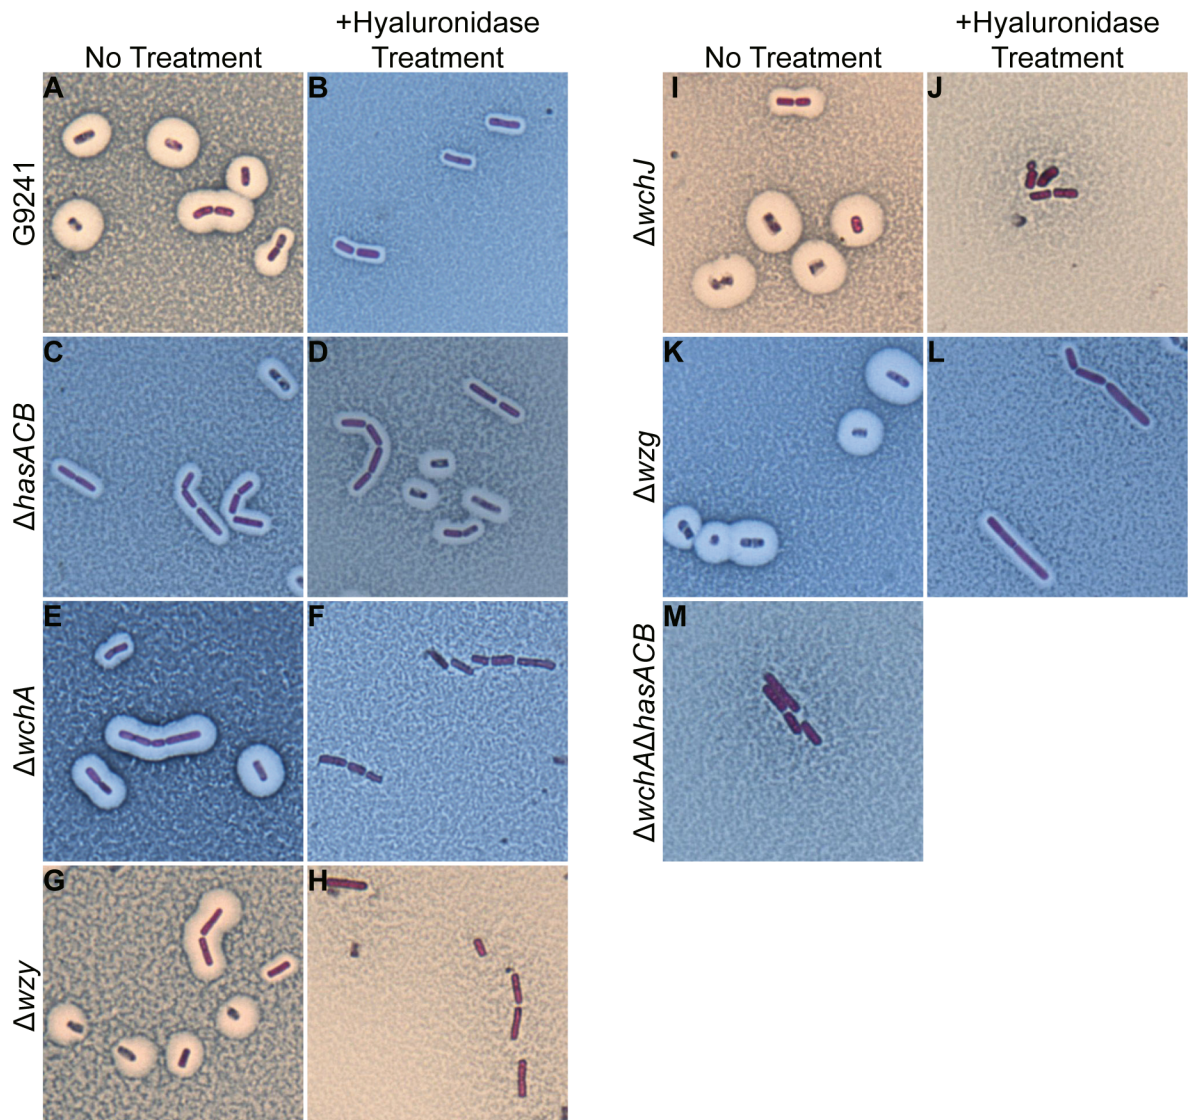

**Fig 5. Capsule production by capsule mutants.** Maneval stain of cells from 24 h capsule-inducing cultures. G9241 (A, B),  $\Delta hasACB$  (C, D),  $\Delta wchA$  (E, F),  $\Delta wzy$  (G, H),  $\Delta wchJ$  (I, J),  $\Delta wzg$  (K, L), and  $\Delta wchA\Delta hasACB$  (M) cells were either untreated (A, C, E, G, I, K, M) or treated with 200 U of hyaluronidase (B, D, F, H, J, L) prior to application of Maneval stain. Cells were visualized with oil immersion at 1,000x magnification.

<https://doi.org/10.1371/journal.pone.0202701.g005>

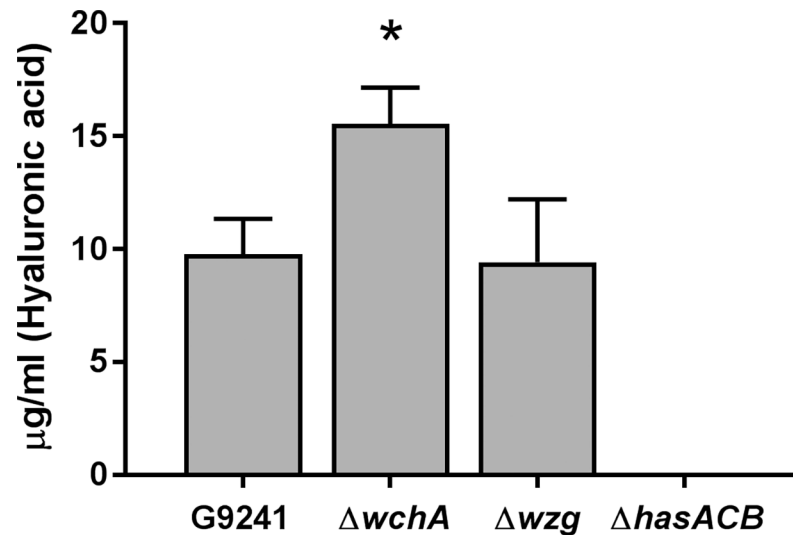

**Fig 6. Quantification of HA capsule.** The HA capsule was extracted from the cell surface with chloroform from 2 ml G9241,  $\Delta wchA$ ,  $\Delta wzg$ ,  $\Delta hasACB$ ,  $\Delta wchA\Delta hasACB$ , and pBCXO1<sup>-</sup>/pBC210<sup>-</sup> cells at OD<sub>600</sub> 0.34–0.36. The quantity of HA capsule in the extract was determined by Stains-all assay and comparison against a standard curve of purified HA. Three strains ( $\Delta hasACB$ ,  $\Delta wchA\Delta hasACB$  and pBCXO1<sup>-</sup>/pBC210<sup>-</sup>) had no detectable HA by this assay. Only  $\Delta hasACB$  values are shown on the graph. The bars indicate the mean of four experiments and the error bars the standard deviation. \* Significantly different ( $P < 0.0003$ ) from G9241 and  $\Delta wzg$  as determined by one-way ANOVA with Tukey's multiple comparisons test.

<https://doi.org/10.1371/journal.pone.0202701.g006>

TS capsule remained visible after hyaluronidase treatment (Fig 5L). In the  $\Delta wchA\Delta hasACB$  mutant, neither capsule was produced, as indicated by the absence of a halo around cells that were untreated (Fig 5M).

To quantify the amount of HA capsule produced by G9241 and the capsule mutants, we extracted the HA capsule from the cell surface with chloroform and quantified the capsule with Stains-all (Fig 6). The  $\Delta wchA$  mutant produced significantly more capsule (15 μg/ml) than either G9241 (10 μg/ml) or  $\Delta wzg$  (10 μg/ml) ( $P < 0.0003$ ). No capsule was detected in the extracts from the strains that did not appear to express HA microscopically:  $\Delta hasACB$ ,  $\Delta wchA\Delta hasACB$ , or pBCXO1<sup>-</sup>/pBC210<sup>-</sup>.

### Effect of capsule mutations on virulence

To determine whether the changes in capsule phenotypes in the mutants also affected virulence, we inoculated mice with spores and calculated the lethal dose 50% (LD<sub>50</sub>) (Table 1). As previously reported, the LD<sub>50</sub>s for G9241 in the more susceptible A/J mice were 7 spores for subcutaneous (s.c.) infection and  $3 \times 10^3$  spores for intranasal (i.n.) infection [12]. The LD<sub>50</sub> of  $\Delta hasACB$  was 40 spores for s.c. and  $2 \times 10^4$  spores for the i.n. infection routes, both of which are significantly different from the LD<sub>50</sub>s of G9241. There was no change in virulence of the  $\Delta wchA$  spores; the LD<sub>50</sub> values were 8 spores for s.c. infection and  $3 \times 10^3$  spores for i.n. infection. The  $\Delta wchA\Delta hasACB$  mutant was attenuated s.c. (LD<sub>50</sub>:  $8 \times 10^3$  spores) and was avirulent when administered i.n. to A/J mice. We also assessed the mean survival times after an inoculation of about ten times the LD<sub>50</sub> for G9241:  $10^2$  spores s.c. and  $10^4$  spores i.n. (Fig 7A). In agreement with the differences in LD<sub>50</sub> values, we observed a significant delay in time until death and an increase in the number of survivors after infection via both s.c. and i.n. routes with  $\Delta hasACB$  spores ( $P < 0.032$ ), but not with  $\Delta wchA$  spores.

We also tested the mutants in more resistant C57BL/6 mice. As previously reported, the LD<sub>50</sub>s for G9241 spores in C57BL/6 mice were 44 spores for s.c. infection and  $4 \times 10^5$  spores

**Table 1. LD<sub>50</sub><sup>a</sup> of spores.**

| Strain              | A/J mice                                                            |                                                                     | C57BL/6 mice                                                        |                                                                     |
|---------------------|---------------------------------------------------------------------|---------------------------------------------------------------------|---------------------------------------------------------------------|---------------------------------------------------------------------|
|                     | s.c.                                                                | i.n.                                                                | s.c.                                                                | i.n.                                                                |
| G9241 <sup>b</sup>  | 7                                                                   | 3 x 10 <sup>3</sup>                                                 | 44<br>(16–100)                                                      | 4 x 10 <sup>5</sup><br>(2 x 10 <sup>5</sup> –9 x 10 <sup>5</sup> )  |
| <i>ΔhasACB</i>      | 44 <sup>c</sup><br>(11–116)                                         | 2 x 10 <sup>4c</sup><br>(7 x 10 <sup>3</sup> –5 x 10 <sup>4</sup> ) | 6 x 10 <sup>3c</sup><br>(2 x 10 <sup>3</sup> –2 x 10 <sup>4</sup> ) | 3 x 10 <sup>6c</sup><br>(8 x 10 <sup>5</sup> –2 x 10 <sup>7</sup> ) |
| <i>ΔwchA</i>        | 8<br>(1–30)                                                         | 3 x 10 <sup>3</sup><br>(1 x 10 <sup>3</sup> –7 x 10 <sup>3</sup> )  | 5 x 10 <sup>2c</sup><br>(2 x 10 <sup>2</sup> –1 x 10 <sup>3</sup> ) | 4 x 10 <sup>5</sup><br>(1 x 10 <sup>5</sup> –1 x 10 <sup>6</sup> )  |
| <i>ΔwchAΔhasACB</i> | 8 x 10 <sup>3c</sup><br>(3 x 10 <sup>3</sup> –3 x 10 <sup>4</sup> ) | >10 <sup>7</sup>                                                    | >10 <sup>7</sup>                                                    | N/A                                                                 |

<sup>a</sup> All LD<sub>50</sub> values calculated by probit analysis; 95% confidence interval, if provided by SPSS software, in parentheses

<sup>b</sup> As previously published [12]

<sup>c</sup> LD<sub>50</sub> significantly different from G9241 as determined by comparison of relative median potencies in SPSS software

<https://doi.org/10.1371/journal.pone.0202701.t001>

for i.n. infection. The *ΔhasACB* spores were attenuated compared to G9241, with LD<sub>50</sub>s of 6 x 10<sup>3</sup> spores for s.c. infection and 3 x 10<sup>6</sup> spores for i.n. infection. The *ΔwchA* spores were attenuated for s.c. infection (5 x 10<sup>2</sup> spores) but had similar virulence to G9241 for i.n. infection (4 x 10<sup>5</sup> spores). The *ΔwchAΔhasACB* spores were only administered to C57BL/6 mice via the s.c. route, and the spores were avirulent. We also compared the median survival of mice after inoculation of ten times the LD<sub>50</sub> for G9241 in C57BL/6 mice (Fig 7B). There was a significant difference in survival time for mice after s.c. inoculation with 10<sup>3</sup> G9241 spores compared to mice that received either *ΔhasACB* (*P* < 0.0001) or *ΔwchA* (*P* = 0.0139) spores. After i.n. inoculation, only mice that received 10<sup>6</sup> *ΔhasACB* spores had a difference in survival time compared to mice that received the same dose of G9241 spores (*P* = 0.0051).

## Discussion

In this study, we characterized the expression of genes in the TS capsule locus and determined that these genes are likely transcribed as two operons. Additionally, we defined the promoter regions upstream of the genes at the beginning of the two operons that were activated under capsule-inducing conditions. We also identified genes in both of these TS capsule operons that are essential for capsule production. Deletion of *wchJ*, a glycosyltransferase, and *wzy*, the polymerase, in the first operon abrogated production of the TS capsule. Similarly, deletion of the initiating glycosyltransferase, *wchA*, in the second operon also abrogated production of the TS capsule. The former two genes were not included in the previous characterization of the TS capsule locus as *bpsX-H* [11].

*S. pneumoniae* capsule regions have a single promoter upstream of the first gene of the locus. The genes are aligned in close proximity, often with less than 100 bp between genes, and are transcribed as a single operon [28, 29]. Additionally, the locus for *Staphylococcus aureus* type 8 capsule is transcribed as a single operon [30]. However, the G9241 capsule locus consists of two potential operons with a gap of over 1,500 bp between the operons. While the results of the gene junction PCR indicate that *wzg* is the first gene in the potential second transcript, no promoter region was identified upstream of the gene. One possibility is that *wzg* is transcribed from the first operon in the capsule locus and the full length read that includes *wzg* is present at such low levels that we could not detect the junction. The promoter that drives *wzg* transcription could be so weak that the β-galactosidase did not reach levels sufficient to see activity. We did, however, detect promoter activity upstream of *wzd*, the second gene in the potential



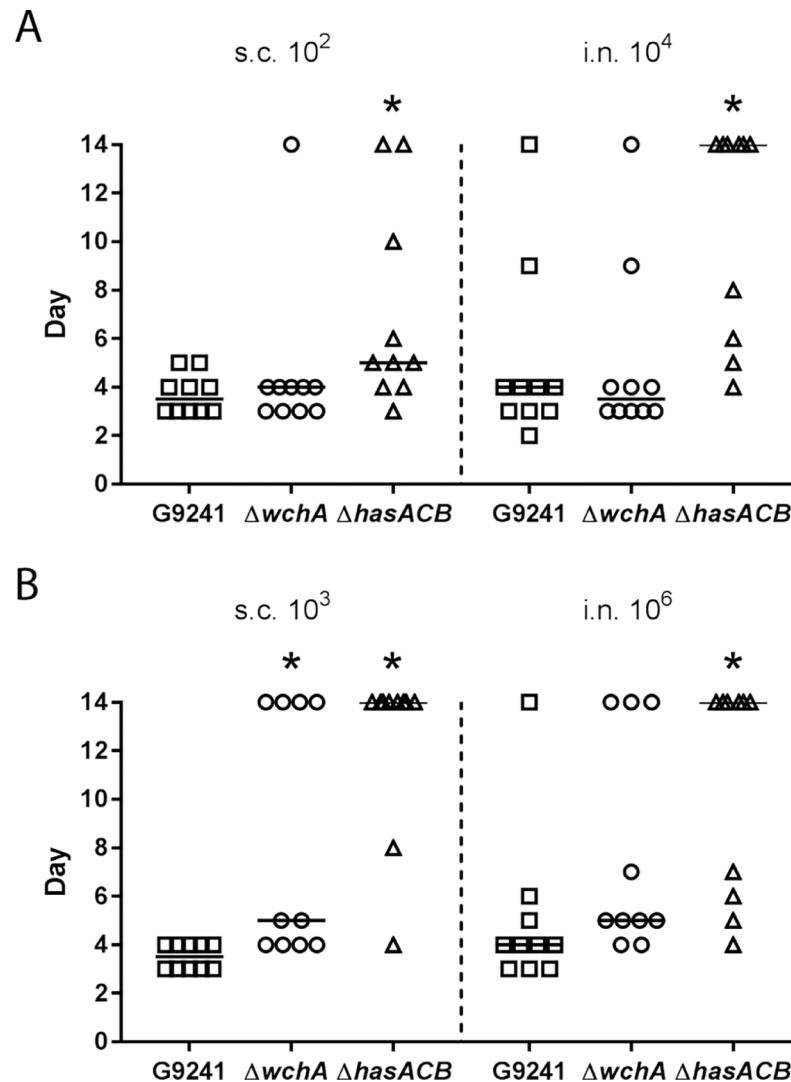

**Fig 7. Median survival of A/J and C57BL/6 mice after infection with spores.** (A) Day that A/J mice succumbed to infection after inoculation with  $10^2$  spores s.c. or  $10^4$  spores i.n. of G9241,  $\Delta wchA$ , or  $\Delta hasACB$ . (B) Day that C57BL/6 mice succumbed to infection after inoculation with  $10^3$  spores s.c. or  $10^6$  spores i.n. of G9241,  $\Delta wchA$ , or  $\Delta hasACB$ . The horizontal black line represents the median, and symbols on day 14 are mice that survived the infection. \* Significantly different from G9241 spores at same dose as determined by Kruskal-Wallis with Dunn's multiple comparisons test.

<https://doi.org/10.1371/journal.pone.0202701.g007>

second transcript. This indicates that if a single transcript of the TS capsule locus is possible, then other promoter sites to initiate transcription along the operon exist.

Both capsule loci contain a gene whose product has the same function (*galU/hasC*) which could cause competition for substrates required for the polysaccharide subunits. There was more HA capsule isolated from  $\Delta wchA$  cells, which produce only the HA capsule, than from the G9241 and  $\Delta wzg$  cells that produce both capsules. While we are unable to quantify the TS capsule, the halo visible around  $\Delta hasACB$  cells, which produced only the TS capsule, with Maneval stain was larger than the halos observed post-hyaluronidase treatment of strains that produced both capsules. We speculate that when a single polysaccharide capsule is produced, more substrate is available for the remaining capsule synthesis enzymes to use and more capsule can be produced.

Bacterial capsules help the bacteria evade the immune system by mimicry of host molecules, reduction of phagocytosis, and protection from complement. The disaccharide of the HA capsule, hyaluronan, as well as sialic acid from the TS capsule are both produced by mammalian hosts and might not be immunogenic. Additionally, both the HA and TS capsules inhibit phagocytosis of G9241 by a murine macrophage cell line [11]. The bacterial capsules may also protect the bacteria from complement, a possibility that is consistent with the observation that the non-encapsulated  $\Delta wchA\Delta hasACB$  strain was avirulent via s.c. infection in C57BL/6 mice but was virulent in A/J mice. A/J mice are naturally deficient in complement component C5 and have reduced inflammatory cell recruitment to the site of infection [31, 32].

In a previous report, C57BL/6 mice had a survival rate of 40% after intraperitoneal challenge with  $10^5$   $\Delta hasACB$  spores and 50% after a dose of  $10^5$  spores of a TS-deficient strain [11]. This finding varies from our results that demonstrate a ten-fold difference in virulence between  $\Delta hasACB$  and the TS-deficient  $\Delta wchA$  strain in C57BL/6 mice. The LD<sub>50</sub> of the  $\Delta hasACB$  spores and TS-deficient spores via intraperitoneal infection were not provided, but it is possible that a  $10^5$  dose of spores is much higher than the LD<sub>50</sub> value, such that differences between the strains would not be apparent. However, even in the more susceptible A/J mice, the  $\Delta hasACB$  mutant had a five-fold increase in LD<sub>50</sub> after s.c. infection and a ten-fold increase for i.n. infection compared to wild type G9241. These data indicate that the HA capsule is more important for virulence than the TS capsule. In the complement competent C57BL/6 mice, capsule is required for virulence and this is consistent with the previous findings that a non-encapsulated G9241 mutant was avirulent via intraperitoneal infection in C57BL/6 mice [11].

*B. cereus* biovar *anthracis* strain CA, isolated from great apes, contains pBCXO1 and pBCXO2 and produces HA and PDGA capsules. When the *hasACB* operon was deleted, there was no change in LD<sub>50</sub> compared to the wild type strain in outbred mice for either s.c. or i.n. infection routes. When pBCXO2 was cured from the strain and HA was the only capsule produced, there was an almost ten-fold increase in LD<sub>50</sub> after s.c. infection, but no difference in LD<sub>50</sub> after i.n. infection [27]. These results suggest that the PDGA capsule is more important for virulence in a s.c. infection than the HA capsule, although it is possible that other factors on pBCXO2 could contribute to virulence. This deficiency in the contribution of the HA capsule to virulence compared to the PDGA capsule could explain the reduced virulence of G9241 compared to *B. anthracis* in some models.

Overall, we demonstrated that the TS capsule locus consists of two operons and that genes in both operons are required for G9241 to elaborate the TS capsule. Our data also indicate that if a single capsule is produced, as we demonstrated with the HA capsule, that more capsule may be expressed on the cell surface. With the emergence of *B. cereus* strains that produce the *B. anthracis*-associated toxins and elaborate capsules that are not the PDGA capsule, it is important to understand how these capsules contribute to virulence. For G9241, we determined that while at least one of its polysaccharide capsules is required for virulence, the presence of the HA capsule may be more beneficial to the bacterial cell in the *in vivo* environment.

## Materials and methods

### Strains and growth conditions

All bacterial strains and plasmids used in this study are listed in Table 2. For growth, bacteria were cultured in Luria-Bertani broth supplemented with antibiotics (when required) as follows: kanamycin (100 µg/ml) or erythromycin (5 µg/ml) for *B. cereus* and kanamycin (50 µg/ml), chloramphenicol (20 µg/ml), or ampicillin (100 µg/ml) for *Escherichia coli* unless otherwise specified. Unless otherwise specified, for capsule-inducing conditions, an overnight

**Table 2. Bacterial strains and plasmids.**

| Name                                | Description                                                                                                                             | Reference  |
|-------------------------------------|-----------------------------------------------------------------------------------------------------------------------------------------|------------|
| <i>B. cereus</i> strains            |                                                                                                                                         |            |
| G9241                               | Wild type strain with pBCXO1 and pBC210                                                                                                 | [7]        |
| $\Delta w z g$                      | G9241 $\Delta w z g$                                                                                                                    | This study |
| $\Delta w c h A$                    | G9241 $\Delta w c h A$                                                                                                                  | This study |
| $\Delta h a s A C B$                | G9241 $\Delta h a s A C B::\Omega$ -kan; Kan <sup>r</sup>                                                                               | This study |
| $\Delta w c h A \Delta h a s A C B$ | G9241 $\Delta w c h A \Delta h a s A C B::\Omega$ -kan, Kan <sup>r</sup>                                                                | This study |
| $\Delta w c h J$                    | G9241 $\Delta w c h J$                                                                                                                  | This study |
| $\Delta w z y$                      | G9241 $\Delta w z y$                                                                                                                    | This study |
| pBCXO1/pBC210                       | G9241 cured of pBCXO1 and pBC210                                                                                                        | [33]       |
| Plasmids                            |                                                                                                                                         |            |
| pUTE304-18Z                         | Low copy number plasmid pHT304 with promoterless <i>lacZ</i> ; Ap <sup>r</sup> in <i>E. coli</i> , Erm <sup>r</sup> in <i>B. cereus</i> | [34]       |

Ap<sup>r</sup>, ampicillin resistant; Erm<sup>r</sup>, erythromycin resistant; Kan<sup>r</sup>, kanamycin resistant

<https://doi.org/10.1371/journal.pone.0202701.t002>

culture of *B. cereus* was sub-cultured 1:1,000 into fresh heart infusion (HI) broth supplemented with 50% heat-inactivated horse serum and 0.8% sodium bicarbonate and incubated at 37°C with 14% CO<sub>2</sub>. Spores were cultivated and isolated as described previously [12].

### RNA extraction, RT-PCR, and 5' RACE

To determine whether genes for the synthesis of the TS capsule were expressed in an operon, RNA was extracted from cells grown to late-exponential phase (HI broth supplemented with 0.8% sodium bicarbonate, 37°C with 5% CO<sub>2</sub>) with slight modification to a method described previously [35, 36]. Briefly, bacteria were harvested from cultures via centrifugation at 10,000 x g for 15 min at 4°C. The pellet was resuspended in 1 ml lysozyme (20 mg/ml in TE buffer) and incubated for 2 h at 37°C, with shaking at 250 rpm. The cells were then lysed by the addition of 200 µl 20% SDS and 10 µl of proteinase K (20 mg/ml). After the samples were incubated for 1 h at 37°C with shaking, 3 ml TRIzol (Thermo Fisher Scientific, Waltham, MA) was added. The samples were agitated with a vortex three times for 5 sec and then allowed to sit at room temperature for 3–5 min. Chloroform (0.2 ml/1 ml TRIzol) was added and the samples were agitated on a vortex for 15 sec. The samples were separated by centrifugation at 3,000 x g for 15 min at 4°C, and the top aqueous phase was transferred to a fresh 15 ml conical tube. An equal volume of 100% isopropanol was added, and the samples were shaken with a vortex at low speed. The RNA was subsequently isolated via a vacuum manifold procedure and was eluted with RNase-free H<sub>2</sub>O twice. The RNA was checked for integrity by gel electrophoresis on a 1% agarose and 0.5X TBE gel. The cDNA was then synthesized with the Quantitect Reverse Transcription kit (QIAGEN, Germantown, MD). To test whether the capsule synthesis genes were transcribed together, cDNA was used as the template for PCR-amplification of junctions between genes. A complete list of primers used for this study can be found in S1 Table.

For determination of transcriptional start sites, RNA was extracted with RNAzol as previously described [12] from cultures grown under capsule-inducing conditions to late-exponential phase. DNA contamination was removed from the RNA sample by treatment with the Turbo DNA-free kit (ThermoFisher Scientific). To map transcriptional start sites upstream of *wchJ* and *wzd*, RNA was used with the 5' RACE system for Rapid Amplification of cDNA Ends kit, per the manufacturer's directions (ThermoFisher Scientific).

## Generation of genetic knockouts

The *hasACB* operon was replaced with an  $\Omega$ -kanamycin cassette as described previously [37]. Briefly, the 1 kb flanking regions of the operon were cloned, the kanamycin cassette placed between the regions, and the entire fragment was cloned into pUTE583 for electroporation into G9241. Four genes in the pBC210 capsule operon, *wchJ*, *wzy*, *wzg*, and *wchA*, were deleted as described previously [12]. Briefly, the 1 kb flanking regions of the genes of interest were cloned into pJMS1 for electroporation into G9241. A  $\Delta wchA\Delta hasACB$  double mutant was generated by replacement of *hasACB* with a kanamycin cassette in the  $\Delta wchA$  mutant. Selection of the recombination events was completed as described previously [12, 37]. All mutations were confirmed by PCR and/or Southern blot. The primers used for mutagenesis and confirmation can be found in [S1 Table](#).

## Promoter assays

DNA fragments that contained the upstream region of DNA prior to the ATG start codon for *wchJ*, *wzg*, and *wzd* were cloned into pCR-Blunt II TOPO and confirmed by sequencing the inserted fragments. The primers used to construct the DNA fragments are listed in [S1 Table](#). The fragments were excised with BamHI or BamHI and XbaI, based on the orientation of the fragment in pCR-Blunt II TOPO and ligated into pHT304-18Z in front of the *lacZ* gene [34]. The pHT304-18Z vectors were introduced into  $\Delta wchA\Delta hasACB$  as described previously [37]. Cells were grown under capsule-inducing conditions in media supplemented with erythromycin (2.5  $\mu\text{g/ml}$ ). At 4 h, the  $\text{OD}_{600}$  was recorded and 2 ml of culture were harvested by centrifugation at 16,000  $\times g$  for 2 min. Cells were resuspended in 1 ml Z buffer [0.06M  $\text{Na}_2\text{HPO}_4$ , 0.04M  $\text{NaH}_2\text{PO}_4$ , 0.01M KCl, 0.001M  $\text{MgSO}_4$ , 0.05M  $\beta$ -mercaptoethanol] and transferred to 2 ml screw cap tubes with 200–300  $\mu\text{l}$  0.1 mm zirconia/silica beads. The cells were lysed with the Turbo Mix vortex attachment for 1 min total at setting 9, with 30 s of rest on ice between each 30 s period on the bead beater. Debris was removed by centrifugation at 16,000  $\times g$  for 10 min. The supernatant was removed and added to a fresh tube in which  $\beta$ -galactosidase activity was assayed as previously described by Miller [38]. Each assay was completed in duplicate four separate times, and significant differences compared to empty vector controls were determined by one-way ANOVA with Dunnett's multiple comparisons test.

## Hyaluronidase treatment and visualization of capsule

Cells from cultures grown under capsule-inducing conditions for 24 h were fixed in 10% formaldehyde for at least 1 h. The cells were washed 3 times with PBS, and 50  $\mu\text{l}$  of cells were treated with 200 units of hyaluronidase (Sigma-Aldrich) or an equal volume of water at 37°C for 1–2 h. The cells were washed to remove the hyaluronidase and visualized with Maneval stain (Carolina Biological Supply Co., Burlington, NC) as described previously [12]. Briefly, a sample of bacteria was smeared with 1% Congo red and air dried. Maneval stain was applied to the samples for 5 min, then slides were washed with water and air dried. Slides were viewed under oil immersion at 1,000X magnification.

## Chloroform extraction and Stains-all assay

For extraction of HA capsule from cells, cultures were grown for 24 h under capsule-inducing conditions and then 2 ml of cultures standardized to an  $\text{OD}_{600}$  0.34–0.36 were harvested by centrifugation for 10 min at 16,000  $\times g$ . Cells were washed with water and the cell pellet resuspended in 0.5 ml water and transferred to a 2 ml screw cap tube. A 1 ml volume of chloroform was added to the cell suspension, and the reaction was agitated for 5 min on a Turbo Mix

vortex attachment at a setting of 2. The aqueous and organic layers were separated by centrifugation at 16,000 x g for 10 min. The aqueous (upper) layer was removed and the chloroform extraction repeated. A 25  $\mu$ l volume of the aqueous layer of the second extraction was mixed with 100  $\mu$ l of Stains all solution [50% formamide, 6  $\mu$ l glacial acetic acid and 2 mg Stains-all (Sigma-Aldrich, St. Louis, MO) per 10 ml of solution]. The  $A_{640}$  was obtained and compared to values of a standard curve obtained with purified HA from *Streptococcus equi* (Sigma-Aldrich) to determine the concentration ( $\mu$ g/ml) of HA. Significant differences in the production of HA among strains was determined by one-way ANOVA with Tukey's multiple comparisons test.

### Inoculation of mice with spores

All mouse infections were done under ABSL-2 conditions with approval from the Institutional Animal Care and Use Committee at Uniformed Services University of the Health Sciences (Protocol MIC-15-418) in accordance with the Guide for the Care and Use of Laboratory Animals of the National Institutes of Health. Spores suspended in 100  $\mu$ l PBS were injected s.c. into the right flank of six-week old female A/J or C57/BL6 mice (Jackson Laboratories, Bar Harbor, ME) or 50  $\mu$ l of spores in PBS were introduced i.n. to the anesthetized mice as described previously [33]. Groups of five mice were inoculated with spores serially diluted 10-fold. At least two experiments were completed to obtain the data for calculation of the LD<sub>50</sub> and median survival. Mice were then monitored for morbidity or mortality for two weeks. Humane endpoints were observed when possible. Mice that displayed multiple distress signs, such as ruffled fur, lethargy, hunched posture, and/or lack of response to stimuli, were euthanized by isoflurane overdose followed by cervical dislocation. The LD<sub>50</sub> was calculated by probit analysis with IBM SPSS Statistics 22 software (IBM, Armonk, NY). Comparisons among the LD<sub>50</sub>s of different strains were completed by comparison of the relative median potency values in SPSS software. If the 95% confidence interval of the relative median potency value did not contain the number one, then the LD<sub>50</sub>s were significantly different. Significant differences in the median survival of mice following infection with spores were determined by Kruskal-Wallis with Dunn's multiple comparisons test.

### Supporting information

**S1 Table. Primers used in this study.** The sequences of primers and their purpose in this study.  
(DOCX)

### Acknowledgments

This study was supported by awards HU0001-15-2-0030 and HU0001-16-2-0066 (ADO) from the Biological Defense Research Directorate of the Naval Medical Research Center and R21 AI111101 (ADO) from the National Institute of Allergy and Infectious Diseases. The opinions and assertions contained herein are the private ones of the authors and are not to be construed as official or reflecting the views of the Department of Defense, the Department of the Navy, the Uniformed Services University of the Health Sciences, or the National Institutes of Health.

### Author Contributions

**Conceptualization:** Jennifer M. Scarff, Yuliya I. Seldina, Christy L. Ventura, Alison D. O'Brien.

**Data curation:** Jennifer M. Scarff, Yuliya I. Seldina, James M. Vergis.

**Funding acquisition:** Alison D. O'Brien.

**Investigation:** Jennifer M. Scarff, James M. Vergis.

**Methodology:** Jennifer M. Scarff, Yuliya I. Seldina, James M. Vergis.

**Writing – original draft:** Jennifer M. Scarff.

**Writing – review & editing:** Yuliya I. Seldina, James M. Vergis, Christy L. Ventura, Alison D. O'Brien.

## References

1. Bottone EJ. *Bacillus cereus*, a volatile human pathogen. Clin Microbiol Rev. 2010; 23(2):382–98. <https://doi.org/10.1128/CMR.00073-09> PMID: 20375358; PubMed Central PMCID: PMCPMC2863360.
2. Vodkin MH, Leppla SH. Cloning of the protective antigen gene of *Bacillus anthracis*. Cell. 1983; 34(2):693–7. PMID: 6413077.
3. Robertson DL, Leppla SH. Molecular cloning and expression in *Escherichia coli* of the lethal factor gene of *Bacillus anthracis*. Gene. 1986; 44(1):71–8. PMID: 3021591.
4. Tippetts MT, Robertson DL. Molecular cloning and expression of the *Bacillus anthracis* edema factor toxin gene: a calmodulin-dependent adenylate cyclase. J Bacteriol. 1988; 170(5):2263–6. PMID: 2834337; PubMed Central PMCID: PMC211116.
5. Okinaka RT, Cloud K, Hampton O, Hoffmaster AR, Hill KK, Keim P, et al. Sequence and organization of pXO1, the large *Bacillus anthracis* plasmid harboring the anthrax toxin genes. J Bacteriol. 1999; 181(20):6509–15. PMID: 10515943; PubMed Central PMCID: PMC103788.
6. Makino S, Sasakawa C, Uchida I, Terakado N, Yoshikawa M. Cloning and CO<sub>2</sub>-dependent expression of the genetic region for encapsulation from *Bacillus anthracis*. Mol Microbiol. 1988; 2(3):371–6. PMID: 2456447.
7. Hoffmaster AR, Ravel J, Rasko DA, Chapman GD, Chute MD, Marston CK, et al. Identification of anthrax toxin genes in a *Bacillus cereus* associated with an illness resembling inhalation anthrax. Proc Natl Acad Sci U S A. 2004; 101(22):8449–54. <https://doi.org/10.1073/pnas.0402414101> PMID: 15155910; PubMed Central PMCID: PMC420414.
8. Visschedyk D, Rochon A, Tempel W, Dimov S, Park HW, Merrill AR. Certhrax toxin, an anthrax-related ADP-ribosyltransferase from *Bacillus cereus*. J Biol Chem. 2012; 287(49):41089–102. <https://doi.org/10.1074/jbc.M112.412809> PMID: 22992735; PubMed Central PMCID: PMC3510810.
9. Simon NC, Vergis JM, Ebrahimi AV, Ventura CL, O'Brien AD, Barbieri JT. Host cell cytotoxicity and cytoskeleton disruption by CerADPr, an ADP-ribosyltransferase of *Bacillus cereus* G9241. Biochemistry. 2013; 52(13):2309–18. <https://doi.org/10.1021/bi300692g> PMID: 22934824; PubMed Central PMCID: PMC3661007.
10. Simon NC, Aktories K, Barbieri JT. Novel bacterial ADP-ribosylating toxins: structure and function. Nat Rev Microbiol. 2014; 12(9):599–611. <https://doi.org/10.1038/nrmicro3310> PMID: 25023120.
11. Oh SY, Budzik JM, Garufi G, Schneewind O. Two capsular polysaccharides enable *Bacillus cereus* G9241 to cause anthrax-like disease. Mol Microbiol. 2011; 80(2):455–70. <https://doi.org/10.1111/j.1365-2958.2011.07582.x> PMID: 21371137; PubMed Central PMCID: PMC3538873.
12. Scarff JM, Raynor MJ, Seldina YI, Ventura CL, Koehler TM, O'Brien AD. The roles of AtxA orthologs in virulence of anthrax-like *Bacillus cereus* G9241. Mol Microbiol. 2016; 102(4):545–61. <https://doi.org/10.1111/mmi.13478> PMID: 27490458; PubMed Central PMCID: PMC5118089.
13. Crater DL, van de Rijn I. Hyaluronic acid synthesis operon (*has*) expression in group A streptococci. The Journal of biological chemistry. 1995; 270(31):18452–8. PMID: 7629171.
14. Yother J. Capsules of *Streptococcus pneumoniae* and other bacteria: paradigms for polysaccharide biosynthesis and regulation. Annu Rev Microbiol. 2011; 65:563–81. <https://doi.org/10.1146/annurev.micro.62.081307.162944> PMID: 21721938.
15. Bentley SD, Aanensen DM, Mavroidi A, Saunders D, Rabinowitz E, Collins M, et al. Genetic analysis of the capsular biosynthetic locus from all 90 pneumococcal serotypes. PLoS Genet. 2006; 2(3):e31. <https://doi.org/10.1371/journal.pgen.0020031> PMID: 16532061; PubMed Central PMCID: PMC1391919.

16. Miller JM, Hair JG, Hebert M, Hebert L, Roberts FJ Jr., Weyant RS. Fulminating bacteremia and pneumonia due to *Bacillus cereus*. *J Clin Microbiol*. 1997; 35(2):504–7. PMID: [9003628](#); PubMed Central PMCID: [PMC229612](#).
17. Avashia SB, Riggins WS, Lindley C, Hoffmaster A, Drumgoole R, Nekomoto T, et al. Fatal pneumonia among metalworkers due to inhalation exposure to *Bacillus cereus* Containing *Bacillus anthracis* toxin genes. *Clin Infect Dis*. 2007; 44(3):414–6. <https://doi.org/10.1086/510429> PMID: [17205450](#).
18. Wright AM, Beres SB, Consamus EN, Long SW, Flores AR, Barrios R, et al. Rapidly progressive, fatal, inhalation anthrax-like infection in a human: case report, pathogen genome sequencing, pathology, and coordinated response. *Arch Pathol Lab Med*. 2011; 135(11):1447–59. <https://doi.org/10.5858/2011-0362-SAIR.1> PMID: [21882964](#).
19. Pena-Gonzalez A, Marston CK, Rodriguez RL, Kolton CB, Garcia-Diaz J, Theppote A, et al. Draft Genome Sequence of *Bacillus cereus* LA2007, a Human-Pathogenic Isolate Harboring Anthrax-Like Plasmids. *Genome Announc*. 2017; 5(16). <https://doi.org/10.1128/genomeA.00181-17> PMID: [28428293](#); PubMed Central PMCID: [PMC5399252](#).
20. Marston CK, Ibrahim H, Lee P, Churchwell G, Gumke M, Stanek D, et al. Anthrax Toxin-Expressing *Bacillus cereus* Isolated from an Anthrax-Like Eschar. *PLoS One*. 2016; 11(6):e0156987. <https://doi.org/10.1371/journal.pone.0156987> PMID: [27257909](#); PubMed Central PMCID: [PMC4892579](#).
21. Hoffmaster AR, Hill KK, Gee JE, Marston CK, De BK, Popovic T, et al. Characterization of *Bacillus cereus* isolates associated with fatal pneumonias: strains are closely related to *Bacillus anthracis* and harbor *B. anthracis* virulence genes. *J Clin Microbiol*. 2006; 44(9):3352–60. <https://doi.org/10.1128/JCM.00561-06> PMID: [16954272](#); PubMed Central PMCID: [PMC1594744](#).
22. Sue D, Hoffmaster AR, Popovic T, Wilkins PP. Capsule production in *Bacillus cereus* strains associated with severe pneumonia. *J Clin Microbiol*. 2006; 44(9):3426–8. <https://doi.org/10.1128/JCM.00873-06> PMID: [16954292](#); PubMed Central PMCID: [PMC1594739](#).
23. Gee JE, Marston CK, Sammons SA, Burroughs MA, Hoffmaster AR. Draft Genome Sequence of *Bacillus cereus* Strain BcFL2013, a Clinical Isolate Similar to G9241. *Genome Announc*. 2014; 2(3). <https://doi.org/10.1128/genomeA.00469-14> PMID: [24874674](#); PubMed Central PMCID: [PMC4038879](#).
24. Klee SR, Ozel M, Appel B, Boesch C, Ellerbrok H, Jacob D, et al. Characterization of *Bacillus anthracis*-like bacteria isolated from wild great apes from Côte d'Ivoire and Cameroon. *J Bacteriol*. 2006; 188(15):5333–44. <https://doi.org/10.1128/JB.00303-06> PMID: [16855222](#); PubMed Central PMCID: [PMC1540047](#).
25. Antonation KS, Grutzmacher K, Dupke S, Mabon P, Zimmermann F, Lankester F, et al. *Bacillus cereus* Biovar *Anthraxis* Causing Anthrax in Sub-Saharan Africa—Chromosomal Monophyly and Broad Geographic Distribution. *PLoS Negl Trop Dis*. 2016; 10(9):e0004923. <https://doi.org/10.1371/journal.pntd.0004923> PMID: [27607836](#); PubMed Central PMCID: [PMC5015827](#).
26. Klee SR, Brzuszkiewicz EB, Nattermann H, Bruggemann H, Dupke S, Wollherr A, et al. The genome of a *Bacillus* isolate causing anthrax in chimpanzees combines chromosomal properties of *B. cereus* with *B. anthracis* virulence plasmids. *PLoS One*. 2010; 5(7):e10986. <https://doi.org/10.1371/journal.pone.0010986> PMID: [20634886](#); PubMed Central PMCID: [PMC2901330](#).
27. Brezillon C, Haustant M, Dupke S, Corre JP, Lander A, Franz T, et al. Capsules, Toxins and AtxA as Virulence Factors of Emerging *Bacillus cereus* Biovar *anthracis*. *PLoS Negl Trop Dis*. 2015; 9(4):e0003455. <https://doi.org/10.1371/journal.pntd.0003455> PMID: [25830379](#); PubMed Central PMCID: [PMC4382292](#).
28. Munoz R, Mollerach M, Lopez R, Garcia E. Molecular organization of the genes required for the synthesis of type 1 capsular polysaccharide of *Streptococcus pneumoniae*: formation of binary encapsulated pneumococci and identification of cryptic dTDP-rhamnose biosynthesis genes. *Mol Microbiol*. 1997; 25(1):79–92. PMID: [11902728](#).
29. Wen Z, Sertil O, Cheng Y, Zhang S, Liu X, Wang WC, et al. Sequence elements upstream of the core promoter are necessary for full transcription of the capsule gene operon in *Streptococcus pneumoniae* strain D39. *Infect Immun*. 2015; 83(5):1957–72. <https://doi.org/10.1128/IAI.02944-14> PMID: [25733517](#); PubMed Central PMCID: [PMC4399061](#).
30. Sau S, Sun J, Lee CY. Molecular characterization and transcriptional analysis of type 8 capsule genes in *Staphylococcus aureus*. *J Bacteriol*. 1997; 179(5):1614–21. PMID: [9045821](#); PubMed Central PMCID: [PMC178874](#).
31. Cinader B, Dubiski S, Wardlaw AC. Distribution, Inheritance, and Properties of an Antigen, Mub1, and Its Relation to Hemolytic Complement. *J Exp Med*. 1964; 120:897–924. PMID: [14247728](#); PubMed Central PMCID: [PMC2137855](#).
32. Wetsel RA, Fleischer DT, Haviland DL. Deficiency of the murine fifth complement component (C5). A 2-base pair gene deletion in a 5'-exon. *J Biol Chem*. 1990; 265(5):2435–40. PMID: [2303408](#).

33. Wilson MK, Vergis JM, Alem F, Palmer JR, Keane-Myers AM, Brahmhatt TN, et al. *Bacillus cereus* G9241 makes anthrax toxin and capsule like highly virulent *B. anthracis* Ames but behaves like attenuated toxigenic nonencapsulated *B. anthracis* Sterne in rabbits and mice. *Infect Immun*. 2011; 79(8):3012–9. <https://doi.org/10.1128/IAI.00205-11> PMID: 21576337; PubMed Central PMCID: PMC3147598.
34. Agaisse H, Lereclus D. Structural and functional analysis of the promoter region involved in full expression of the cryIIIA toxin gene of *Bacillus thuringiensis*. *Mol Microbiol*. 1994; 13(1):97–107. PMID: 7984098.
35. Lessard PA, O'Brien XM, Currie DH, Sinskey AJ. pB264, a small, mobilizable, temperature sensitive plasmid from *Rhodococcus*. *BMC Microbiol*. 2004; 4:15. <https://doi.org/10.1186/1471-2180-4-15> PMID: 15084226; PubMed Central PMCID: PMCPMC419973.
36. Gilbreath JJ, West AL, Pich OQ, Carpenter BM, Michel S, Merrell DS. Fur activates expression of the 2-oxoglutarate oxidoreductase genes (oorDABC) in *Helicobacter pylori*. *J Bacteriol*. 2012; 194(23):6490–7. <https://doi.org/10.1128/JB.01226-12> PMID: 23002221; PubMed Central PMCID: PMCPMC3497466.
37. Vergis JM, Cote CK, Bozue J, Alem F, Ventura CL, Welkos SL, et al. Immunization of mice with formalin-inactivated spores from avirulent *Bacillus cereus* strains provides significant protection from challenge with *Bacillus anthracis* Ames. *Clin Vaccine Immunol*. 2013; 20(1):56–65. <https://doi.org/10.1128/CVI.00550-12> PMID: 23114705; PubMed Central PMCID: PMC3535783.
38. Miller JH. *Experiments in Molecular Genetics*. Cold Spring Harbor, NY: Cold Spring Harbor Laboratory; 1972.
